# Supplementary material for: Profile of gut microbiota and serum metabolites associated with metabolic syndrome in a remote island most afflicted by obesity in Japan
Source: PubMed Central journal article supplement (PMC9568508; doi:10.1038/s41598-022-21708-0), 2022-10-14
Supplement: 41598_2022_21708_MOESM1_ESM.pdf [file 41598_2022_21708_MOESM1_ESM.pdf]

**Profile of gut microbiota and serum metabolites associated with metabolic syndrome in a remote island most afflicted by obesity in Japan**

Tsugumi Uema<sup>1</sup>, Jasmine F. Millman<sup>1\*</sup>, Shiki Okamoto<sup>1\*</sup>, Takehiro Nakamura<sup>1</sup>, Kiyoto Yamashiro<sup>1</sup>, Moriyuki Uehara<sup>1</sup>, Ken-ichiro Honma<sup>1</sup>, Minoru Miyazato<sup>2</sup>, Asuka Ashikari<sup>3</sup>, Seiichi Saito<sup>3</sup>, Shiro Maeda<sup>4,5</sup>, Minako Imamura<sup>4,5</sup>, Hajime Ishida<sup>6</sup>, Masayuki Matsushita<sup>7</sup>, Koshi Nakamura<sup>8</sup>, Hiroaki Masuzaki<sup>1\*</sup>

<sup>1</sup> Division of Endocrinology, Diabetes and Metabolism, Hematology, Rheumatology, (Second Department of Internal Medicine), Graduate School of Medicine, University of the Ryukyus, Okinawa, Japan

<sup>2</sup> Department of Systems Physiology, Graduate School of Medicine, University of the Ryukyus, Okinawa, Japan

<sup>3</sup> Department of Urology, Graduate School of Medicine, University of the Ryukyus, Okinawa, Japan

<sup>4</sup> Department of Advanced Genomic and Laboratory Medicine, Graduate School of Medicine, University of the Ryukyus, Okinawa, Japan

<sup>5</sup> Division of Clinical Laboratory and Blood Transfusion, University of the Ryukyus Hospital, Okinawa, Japan

<sup>6</sup> Department of Human Biology and Anatomy, Graduate School of Medicine, University of the Ryukyus, Okinawa, Japan

<sup>7</sup> Department of Molecular and Cellular Physiology, Graduate School of Medicine, University of the Ryukyus, Okinawa, Japan

<sup>8</sup> Department of Public Health and Hygiene, Graduate School of Medicine, University  
of the Ryukyus, Okinawa, Japan

**\* Co-corresponding authors:**

Hiroaki Masuzaki

207 Uehara, Nishihara, Okinawa, 903-0215, Japan

hiroaki@med.u-ryukyu.ac.jp

Tel: +81-98-895-1146, Fax: +81-98-895-1415

ORCID: 0000-0002-2445-1047

Shiki Okamoto

207 Uehara, Nishihara, Okinawa, 903-0215, Japan

shiki@med.u-ryukyu.ac.jp

Tel: +81-98-895-1146, Fax: +81-98-895-1415

ORCID: 0000-0002-2802-0527

Jasmine Frances Millman

207 Uehara, Nishihara, Okinawa, 903-0215, Japan

Jasmine.f.millman@gmail.com

Tel: +81-98-895-1146, Fax: +81-98-895-1415

ORCID: 0000-0001-7049-3881

## Supplementary figure legends

**Figure S1** Concentration of plasma short chain fatty acids (SCFAs) in NO and OB subjects. **a-d.** SCFA concentrations of acetate, propionate, butyrate, and valerate. **e.** Total concentration of plasma SCFAs. NO; non-obese (blue) (n = 81) and OB; obese (red) (n = 59). Data are shown as median and 25th – 75th percentiles. Data were analyzed using Mann-Whitney *U* test to compare groups.

**Figure S2** Concentration of plasma SCFAs in MHO and MUO subjects. **a-d.** SCFA concentrations of acetate, propionate, butyrate, and valerate. **e.** Total concentration of plasma SCFAs. MHO; metabolically healthy obese (light blue) (n = 54) and MUO; metabolically unhealthy obese (orange) (n = 21). Data are shown as median and 25th – 75th percentiles. Data were analyzed using Mann-Whitney *U* test to compare groups.

**Figure S3** Correlations between gut microbiota and selected metabolites in subjects with abdominal obesity (n=75) showing Spearman's correlation between gut microbiome (x axis) and metabolites (y axis). Dots represent each individual subject.

**Table S1** Measurement conditions of CE-TOFMS

Figure S1

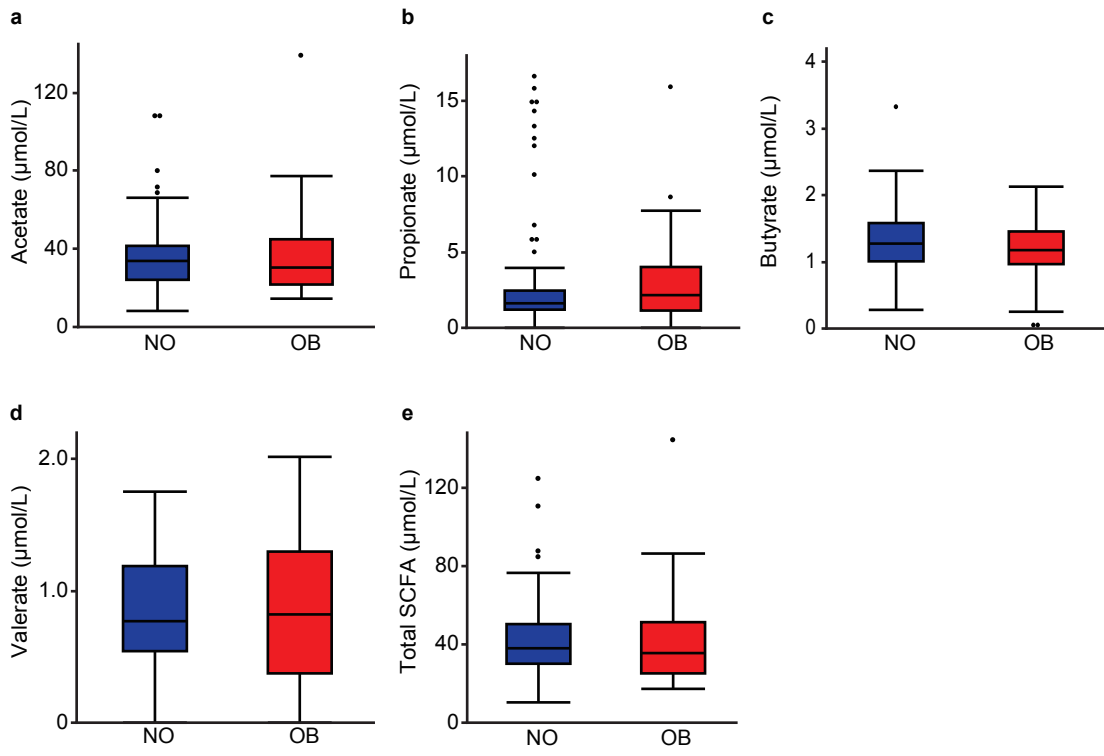

Figure S2

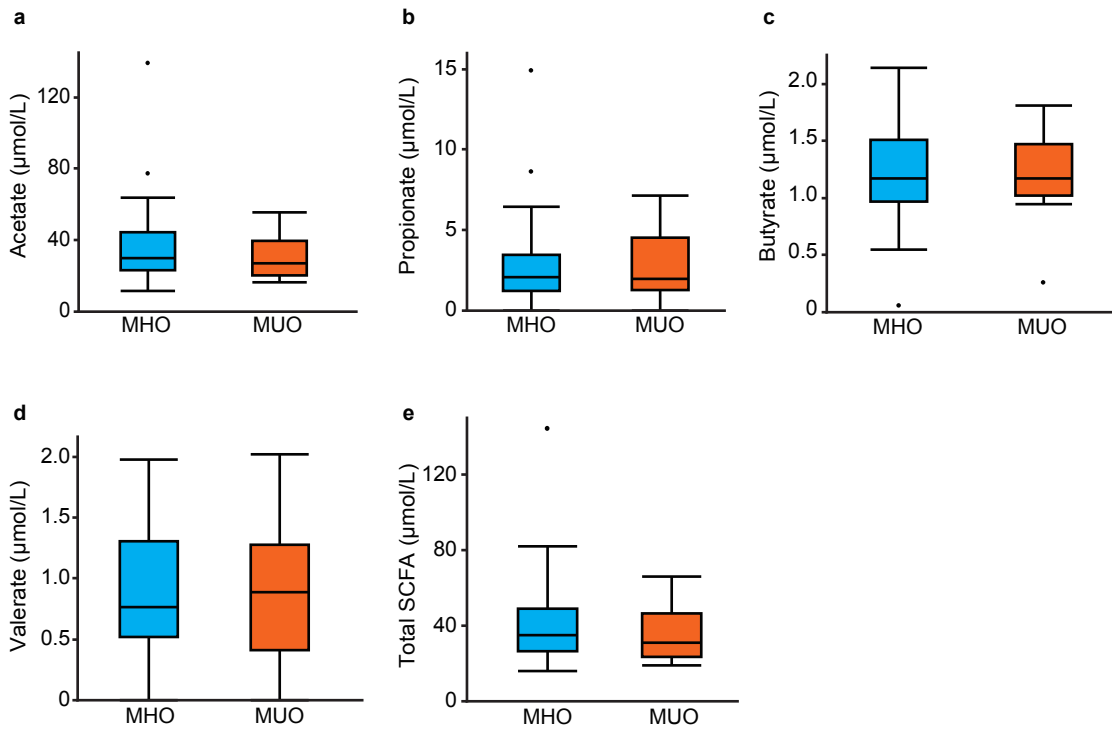

Figure S3

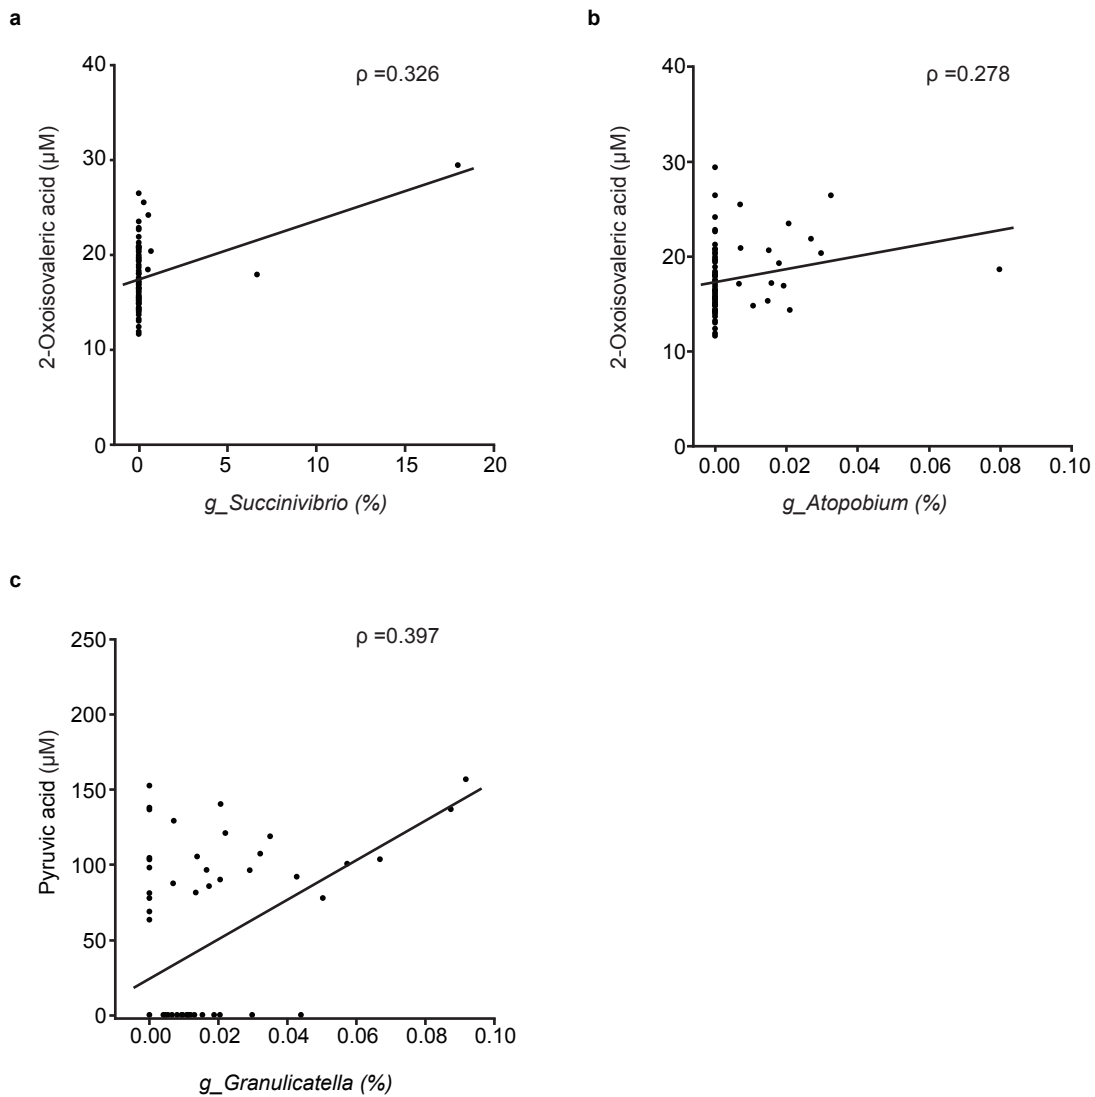

Table S1; Mesuring conditions of CE-TOFMS

|                      | cation                                   | anion                                   |
|----------------------|------------------------------------------|-----------------------------------------|
| Run buffer           | Cation Buffer Solution (p/n :H3301-1001) | Ation Buffer Solution (p/n :I3302-1023) |
| Rinse buffer         | Cation Buffer Solution (p/n :H3301-1001) | Ation Buffer Solution (p/n :I3302-1023) |
| Sample injection     | Pressure injection 50 mbar, 5 sec        | Pressure injection 50 mbar, 10 sec      |
| CE voltage           | Positive, 30kV                           | Positive, 30kV                          |
| MS ionization        | ESI Positive                             | ESI Negative                            |
| MS capillary voltage | 4,000V                                   | 3,500V                                  |
| MS scan range        | m/z 50-1,000                             | m/z 50-1,000                            |
| Sheath liquid        | HMT Sheath Liquid (p/n :H3301-1020)      | HMT Sheath Liquid (p/n :H3301-1020)     |
